# Supplementary material for: Smart-Home Concept for Remote Monitoring of Instrumental Activities of Daily Living (IADL) in Older Adults with Cognitive Impairment: A Proof of Concept and Feasibility Study
Source: MDPI journal article supplement (doi:10.3390/s22186745), 2022-09-07
Supplement: s1 [file s1]

**Table S1. IADLSYS Technology Acceptance Model**

|                                                                                                 | <b>Strongly disagree</b> | <b>Disagree</b> | <b>Neither agree nor disagree</b> | <b>Agree</b> | <b>Strongly agree</b> |
|-------------------------------------------------------------------------------------------------|--------------------------|-----------------|-----------------------------------|--------------|-----------------------|
| <b>Q1:</b> I think I would need the support of a technical person to be able to use the system. | 4                        | 3               | 2                                 | 1            | 0                     |
| <b>Q2:</b> Learning to use the system is/was easy.                                              | 0                        | 1               | 2                                 | 3            | 4                     |
| <b>Q3:</b> The p tags were difficult to work with.                                              | 4                        | 3               | 2                                 | 1            | 0                     |
| <b>Q4:</b> Wearing the sensors is bothersome.                                                   | 4                        | 3               | 2                                 | 1            | 0                     |
| <b>Q5:</b> Using the system is easy.                                                            | 0                        | 1               | 2                                 | 3            | 4                     |
| <b>Q6:</b> I have concerns about privacy or data sharing on my system.                          | 4                        | 3               | 2                                 | 1            | 0                     |
